# Supplementary material for: Robust and durable poly(aryl-co-aryl piperidinium) reinforced membranes for alkaline membrane fuel cells
Source: Royal Society of Chemistry journal article supplement (doi:10.1039/d2ta00196a), 2022-01-01
Supplement: d2ta00196a1.pdf [file d2ta00196a1.pdf]

*Electronic Supplementary Information*

**Robust and Durable Poly(aryl-co-aryl piperidinium)  
Reinforced Membranes for Alkaline Membrane Fuel Cells**

Chuan Hu<sup>a</sup>, Jong Hyeong Park<sup>a</sup>, Hae Min Kim<sup>a</sup>, Ho Hyun Wang<sup>a</sup>, Joon Yong Bae<sup>a</sup>,  
Mei-Ling Liu<sup>a</sup>, Na Yoon Kang<sup>a</sup>, Kyoung-seok Yoon<sup>b</sup>, Chang-dae Park<sup>b</sup>, Nanjun  
Chen<sup>a\*</sup> and Young Moo Lee<sup>a\*</sup>

<sup>a</sup>Department of Energy Engineering, College of Engineering, Hanyang University,  
Seoul 04763, Republic of Korea

<sup>b</sup>W-SCOPE Korea CO., LTD, 106 Gwanhaksanop 4-ro, Ochang-eup, Cheongwon-  
gu, Cheongju-si, Chungbuk 28122, Republic of Korea

\*Corresponding author: chen.n.j.chem@gmail.com; ymlee@hanyang.ac.kr

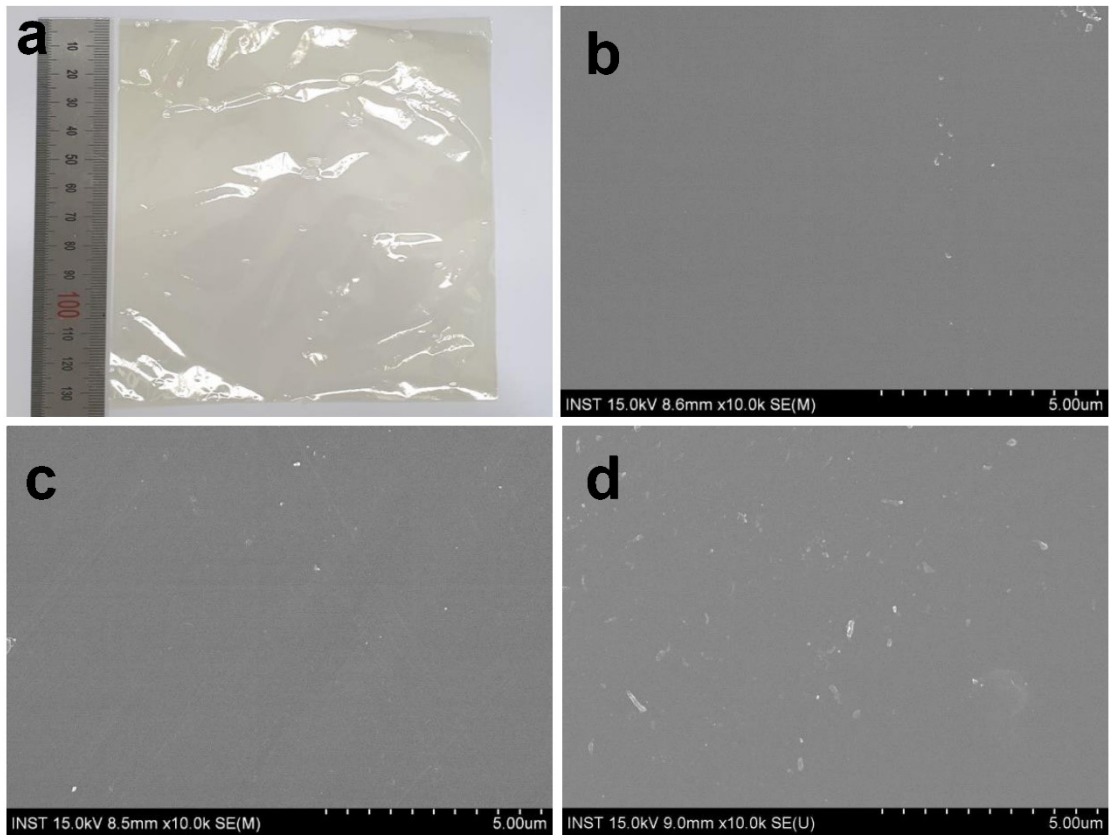

**Fig. S1.** a) Optical image, b) SEM top surface image, and c) SEM bottom surface image of PFTP RCM, respectively. d) SEM bottom surface image of PDTP RCM.

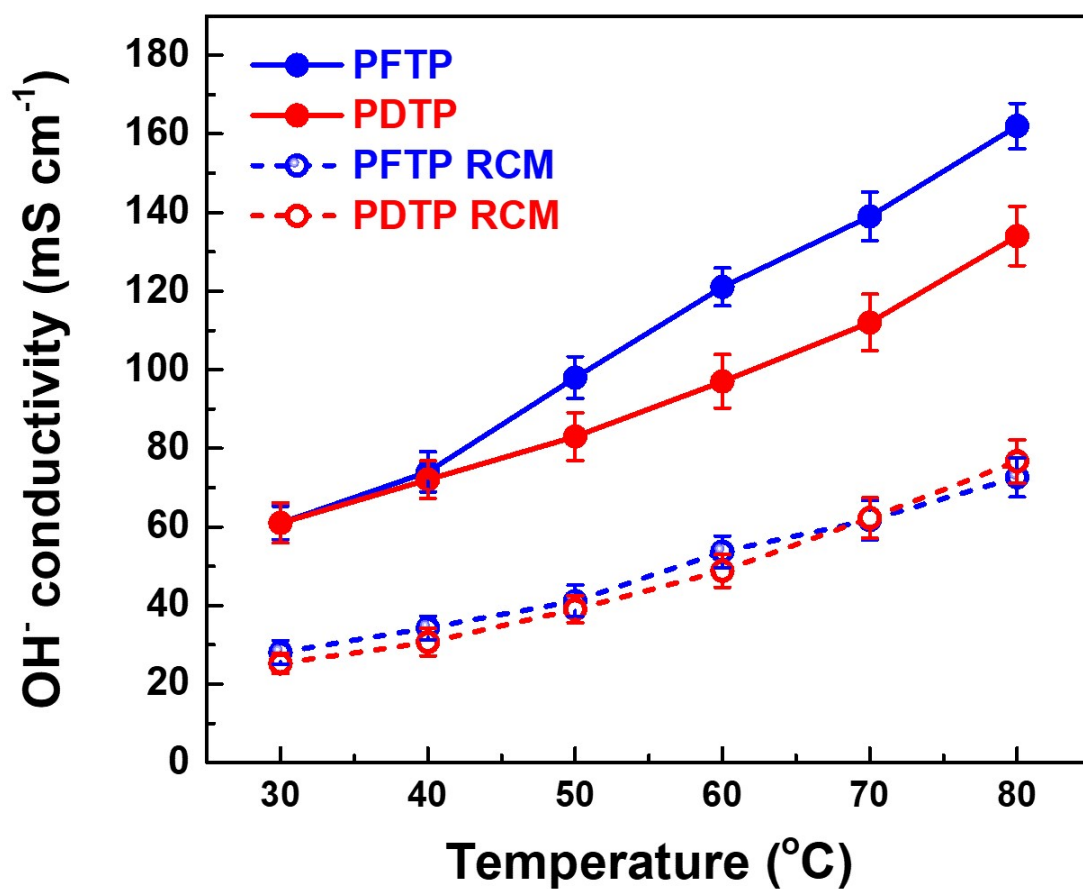

Fig. S2. Hydroxide conductivity as a function of temperatures of pristine membranes and RCMs

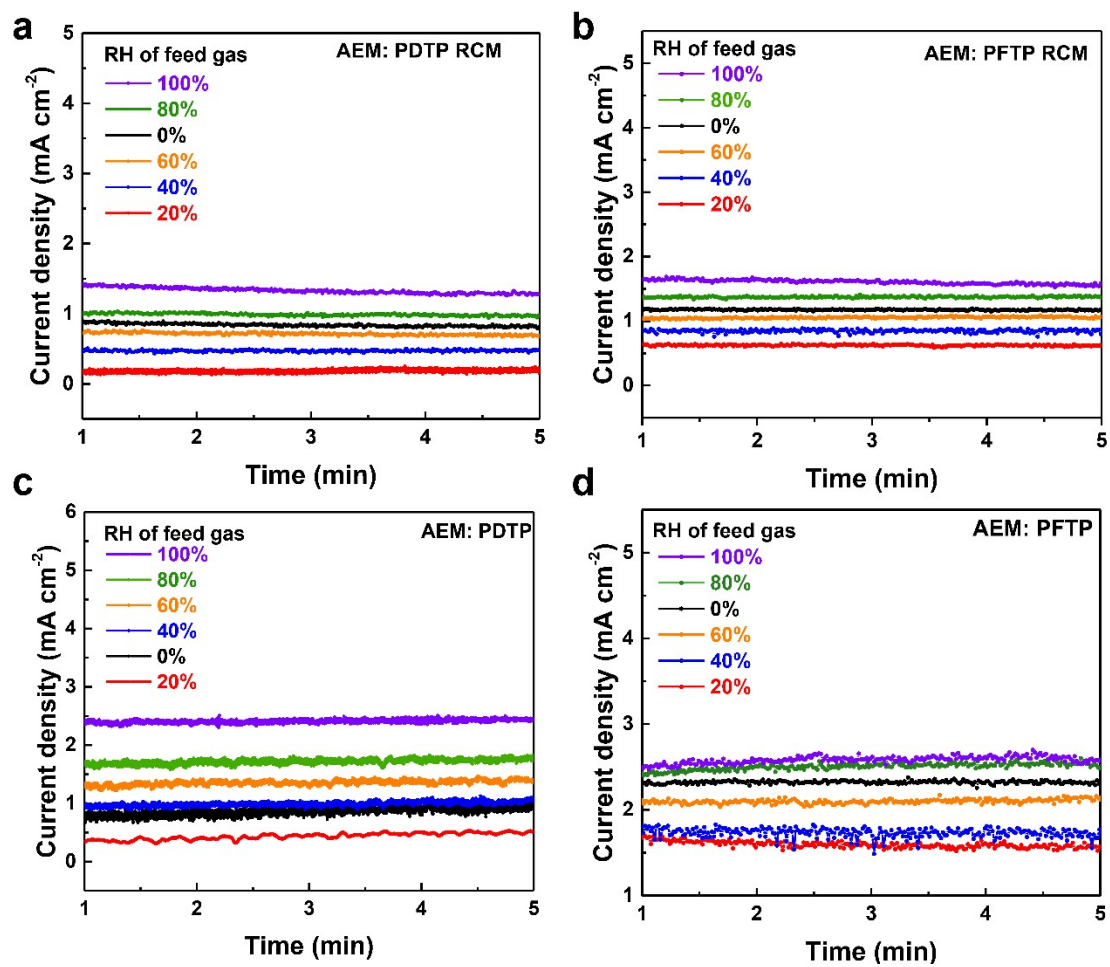

**Fig. S3.** H<sub>2</sub> crossover current density of a) PDTP RCM, b) PFTP RCM, c) PDTP, and d) PFTP membranes related with time at different RHs at 60 °C, 1,000/1,000 mL min<sup>-1</sup> H<sub>2</sub>/N<sub>2</sub>

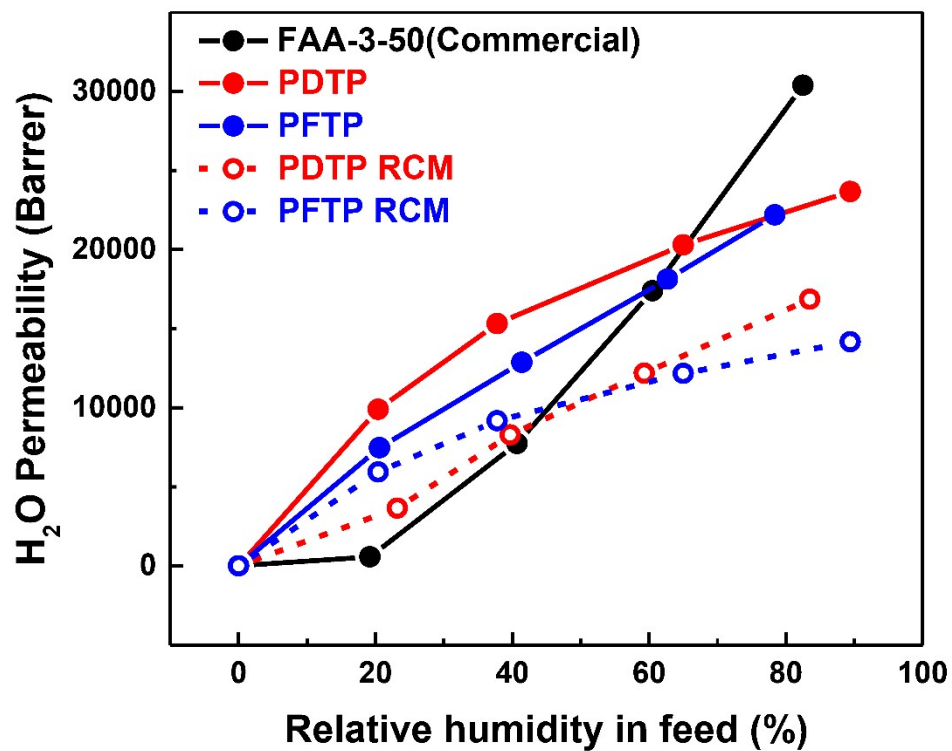

Fig. S4. Water vapor permeability of commercial FAA-3-50, pristine membranes, and RCMs at different RHs.
